# Supplementary material for: Transient nicotine exposure in early adolescent male mice freezes their dopamine circuits in an immature state
Source: PubMed Central journal article supplement (PMC11489768; doi:10.1038/s41467-024-53327-w), 2024-10-18
Supplement: 41467_2024_53327_MOESM1_ESM.pdf [file 41467_2024_53327_MOESM1_ESM.pdf]

## Supplementary information

### Transient nicotine exposure in early adolescent male mice freezes their dopamine circuits in an immature state

**Supplementary Figure 1.** *Supplementary data for Figure 1.* (A) Individual weight measurements across the entire oral self-administration task for adolescent-pretreated (*Left*) and adult-pretreated mice (*Right*). (B) Actograms of drinking behavior over the duration of the Two Bottle Choice task for adult mice pre-treated in adolescence (*left*) or in adulthood (*right*). Shaded regions represent mean volumes across the groups for each solution tested. (C) Sucrose solution and overall liquid consumption per day for adolescent-pretreated (*Left*) and adult-pretreated mice (*Right*) during the Sucrose nicotine oral self-administration testing. (D) Nicotine solution and overall liquid consumption per day for adolescent-pretreated (*Left*) and adult-pretreated mice (*Right*) during the nicotine oral self-administration testing. (E) Individual data for Figure 1B *center*, % nicotine of total intake for mice treated with NIC or SAC in adolescence. (F) Individual data for Figure 1C *center*, % nicotine of total intake for mice treated with NIC or SAC in adulthood. (G) Percent preference for left side bottle across the entire oral self-administration task for adolescent-pretreated (*Left*) and adult-pretreated mice (*Right*). (H) Individual data for Figure 1E, solid lines indicate group means while dotted lines are individual animals for mice treated with NIC or SAC in adolescence. (I) Open arm entries (*Left*) and Distance traveled (cm, *Right*) in the EOM task for adolescent-pretreated mice. (J) Individual data for Figure 1H, solid lines indicate group means while dotted lines are individual animals for mice treated with NIC or SAC in adulthood. (K) Open arm entries (*Left*) and Distance traveled (cm, *Right*) in the EOM task for adult-pretreated mice. All line graphs are presented as mean values  $\pm$  SEM. \* $p < 0.05$ , \*\* $p < 0.01$ , \*\*\* $p < 0.001$ , ns = not significant. Detailed Statistics are available in Supplementary Table 4. Source data are provided as a Source Data file.

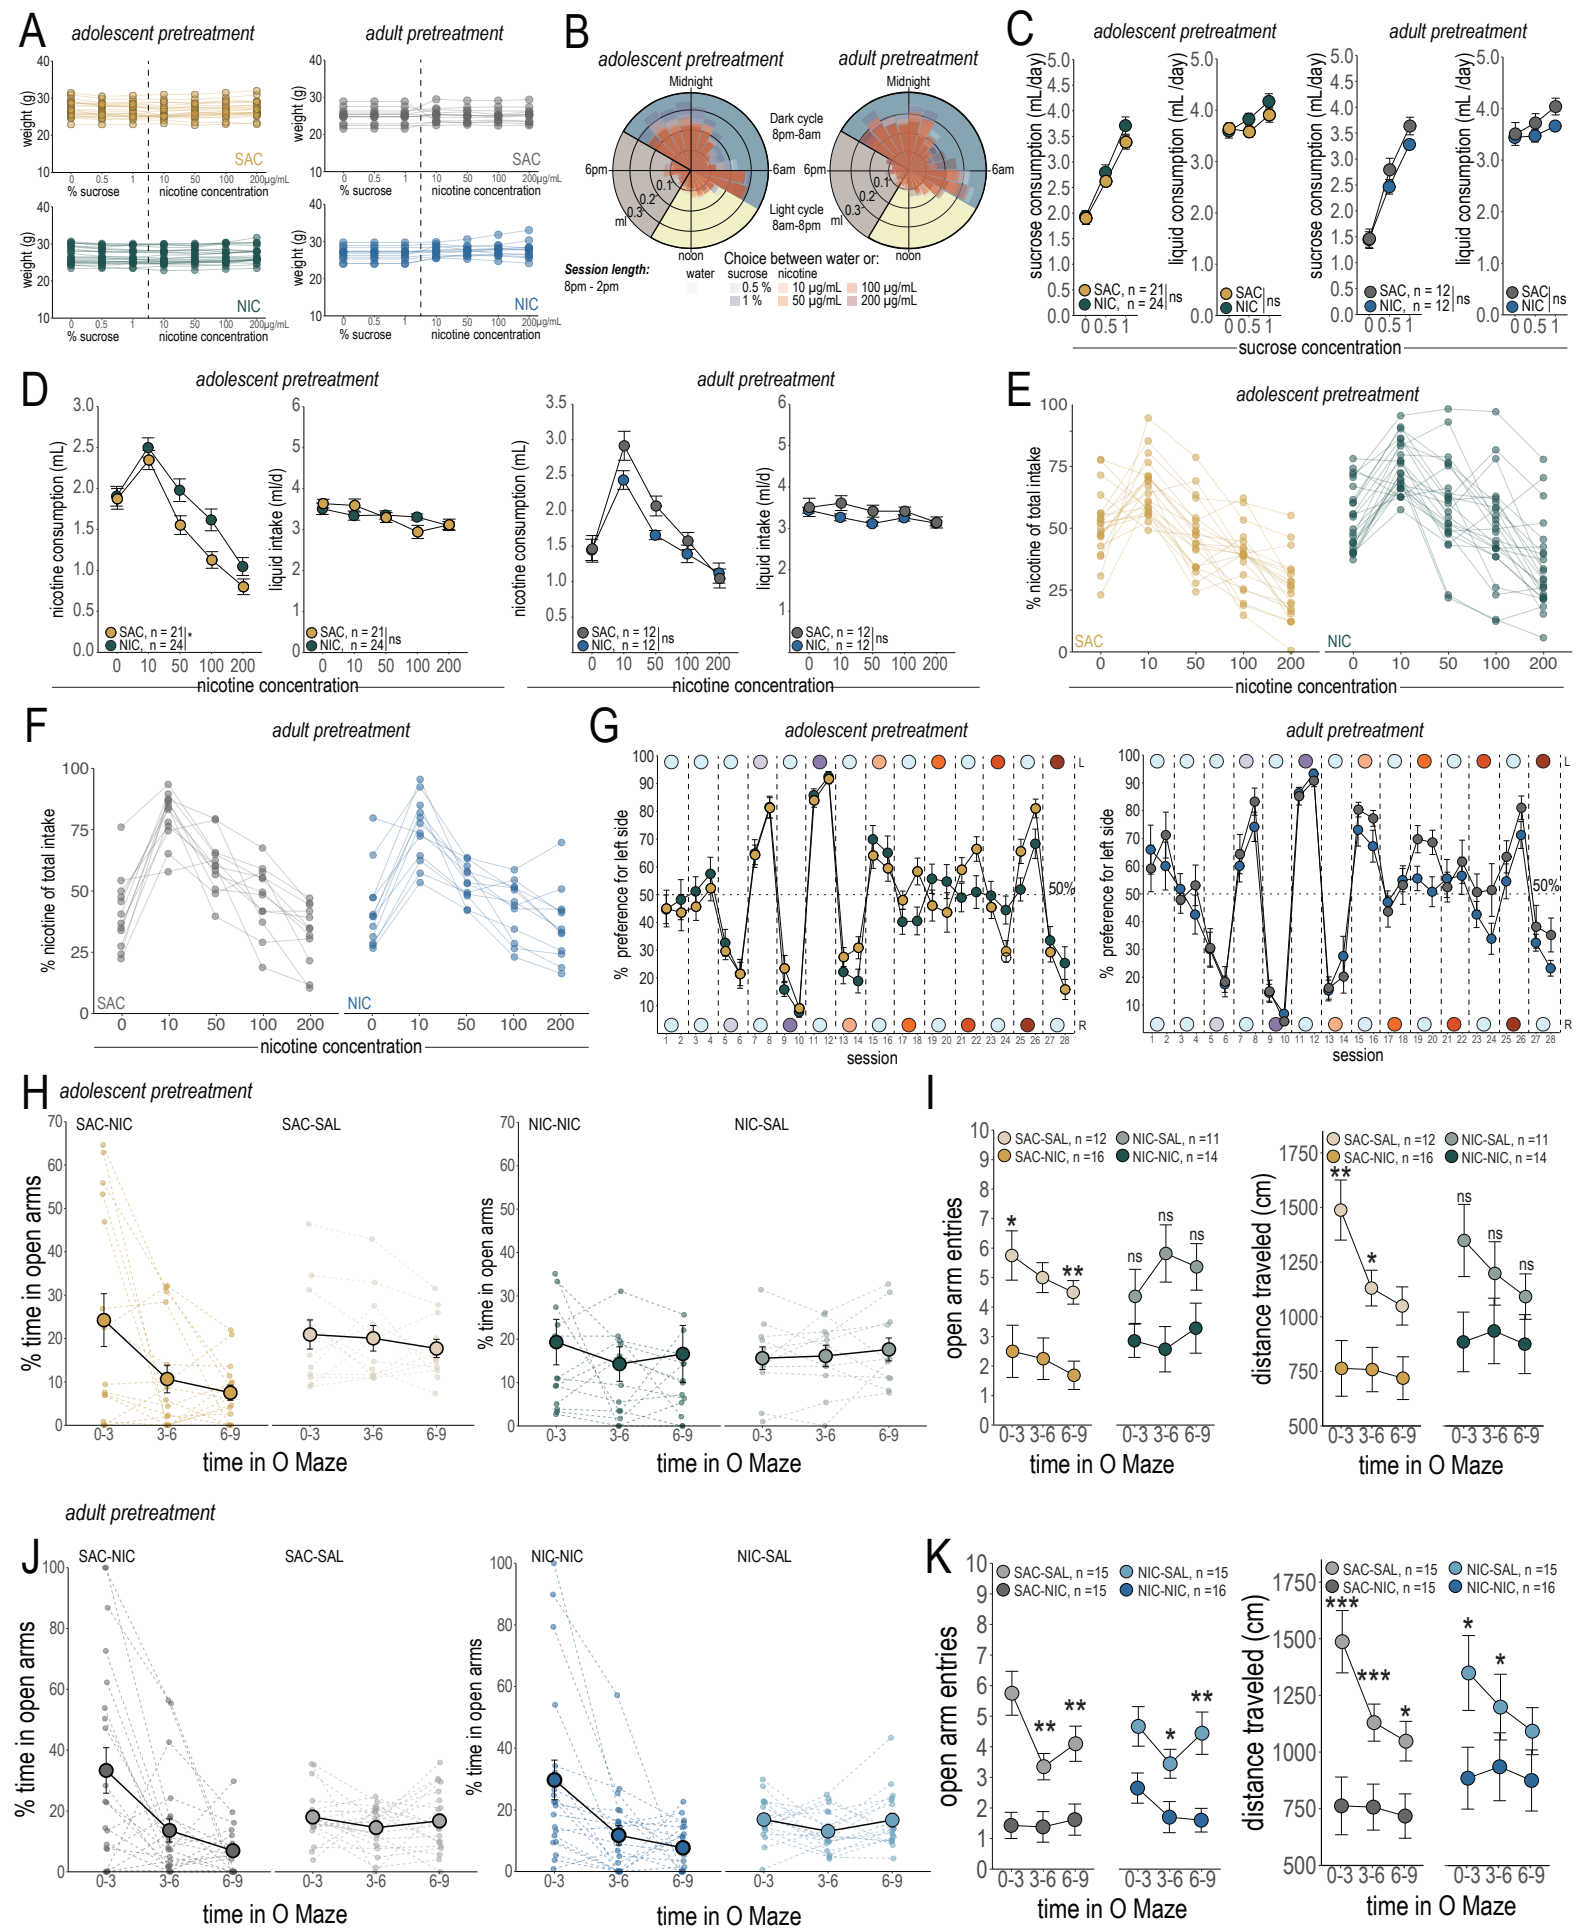

Supplementary Figure 1

## Supplementary Table 1

Detailed Statistics for Supplementary Figure 1

| N                                                             | Test                                              | Factor                 | Statistic | Statistic Value | p value | Corresponding Figure |
|---------------------------------------------------------------|---------------------------------------------------|------------------------|-----------|-----------------|---------|----------------------|
| <b>weight - adolescents</b>                                   |                                                   |                        |           |                 |         |                      |
| SAC = 21, NIC = 24                                            | Shapiro-Wilk normality test                       |                        | W         | 0.9723          | 0.0000  | Fig S1A              |
|                                                               | Wilcoxon rank sum test with continuity correction | SAC vs NIC at 0%       | W         | 237.0000        | 1.0000* |                      |
|                                                               | Wilcoxon rank sum test with continuity correction | SAC vs NIC at 0.5%     | W         | 250.5000        | 1.0000* |                      |
|                                                               | Wilcoxon rank sum test with continuity correction | SAC vs NIC at 1%       | W         | 256.5000        | 1.0000* |                      |
|                                                               | Wilcoxon rank sum test with continuity correction | SAC vs NIC at 10µg/mL  | W         | 264.5000        | 1.0000* |                      |
|                                                               | Wilcoxon rank sum test with continuity correction | SAC vs NIC at 50µg/mL  | W         | 256.5000        | 1.0000* |                      |
|                                                               | Wilcoxon rank sum test with continuity correction | SAC vs NIC at 100µg/mL | W         | 249.5000        | 1.0000* |                      |
|                                                               | Wilcoxon rank sum test with continuity correction | SAC vs NIC at 200µg/mL | W         | 251.5000        | 1.0000* |                      |
| <b>weight - adults</b>                                        |                                                   |                        |           |                 |         |                      |
| SAC = 12, NIC = 12                                            | Shapiro-Wilk normality test                       |                        | W         | 0.9771          | 0.0070  | Fig S1A              |
|                                                               | Wilcoxon rank sum test with continuity correction | SAC vs NIC at 0%       | W         | 60.0000         | 1.0000* |                      |
|                                                               | Wilcoxon rank sum test with continuity correction | SAC vs NIC at 0.5%     | W         | 60.0000         | 1.0000* |                      |
|                                                               | Wilcoxon rank sum test with continuity correction | SAC vs NIC at 1%       | W         | 60.0000         | 1.0000* |                      |
|                                                               | Wilcoxon rank sum test with continuity correction | SAC vs NIC at 10µg/mL  | W         | 71.0000         | 1.0000* |                      |
|                                                               | Wilcoxon rank sum test with continuity correction | SAC vs NIC at 50µg/mL  | W         | 75.5000         | 1.0000* |                      |
|                                                               | Wilcoxon rank sum test with continuity correction | SAC vs NIC at 100µg/mL | W         | 81.0000         | 1.0000* |                      |
|                                                               | Wilcoxon rank sum test with continuity correction | SAC vs NIC at 200µg/mL | W         | 75.0000         | 1.0000* |                      |
| <b>sucrose consumption (mL/day) - adolescent pretreatment</b> |                                                   |                        |           |                 |         |                      |
| * Holm correction for multiple comparisons                    |                                                   |                        |           |                 |         |                      |

## Supplementary Table 1

Detailed Statistics for Supplementary Figure 1

| N                                                              | Test                        | Factor                         | Statistic | Statistic Value | p value | Corresponding Figure |
|----------------------------------------------------------------|-----------------------------|--------------------------------|-----------|-----------------|---------|----------------------|
| SAC = 21, NIC = 24                                             | Shapiro-Wilk normality test |                                | W         | 0.9223          | 0.5218  | Fig S1C              |
|                                                                | Two-way mixed ANOVA         | Interaction                    | F         | 0.9197          | 0.4025  |                      |
|                                                                |                             | Treatment (between subj)       | F         | 1.4590          | 0.2337  |                      |
|                                                                |                             | Sucrose conc (within subjects) | F         | 119.6943        | 0.0000  |                      |
| <b>total liquid intake (mL/day) - adolescent pretreatment</b>  |                             |                                |           |                 |         |                      |
| SAC = 21, NIC = 24                                             | Shapiro-Wilk normality test |                                | W         | 0.8878          | 0.5218  | Fig S1C              |
|                                                                | Two-way mixed ANOVA         | Interaction                    | F         | 1.9069          | 0.4025  |                      |
|                                                                |                             | Treatment (between subj)       | F         | 1.0621          | 0.2337  |                      |
|                                                                |                             | Sucrose conc (within subjects) | F         | 12.6504         | 0.0000  |                      |
| <b>sucrose consumption (mL/day) - adult pretreatment</b>       |                             |                                |           |                 |         |                      |
| SAC = 12, NIC = 12                                             | Shapiro-Wilk normality test |                                | W         | 0.9088          | 0.4287  | Fig S1C              |
|                                                                | Two-way mixed ANOVA         | Interaction                    | F         | 0.5978          | 0.5531  |                      |
|                                                                |                             | Treatment (between subj)       | F         | 2.5198          | 0.1174  |                      |
|                                                                |                             | Sucrose conc (within subjects) | F         | 0.0534          | 0.9480  |                      |
| <b>total liquid intake (mL/day) - adult pretreatment</b>       |                             |                                |           |                 |         |                      |
| SAC = 12, NIC = 12                                             | Shapiro-Wilk normality test |                                | W         | 0.8711          | 0.2307  | Fig S1C              |
|                                                                | Two-way mixed ANOVA         | Interaction                    | F         | 0.4784          | 0.6220  |                      |
|                                                                |                             | Treatment (between subj)       | F         | 3.1207          | 0.0821  |                      |
|                                                                |                             | Sucrose conc (within subjects) | F         | 1.3045          | 0.2785  |                      |
| <b>nicotine consumption (mL/day) - adolescent pretreatment</b> |                             |                                |           |                 |         |                      |
| SAC = 21, NIC = 24                                             | Shapiro-Wilk normality test |                                | W         | 0.9888          | 0.0769  | Fig S1D              |
|                                                                | Two-way mixed ANOVA         | Interaction                    | F         | 1.7830          | 0.1344  |                      |

\* Holm correction for multiple comparisons

## Supplementary Table 1

Detailed Statistics for Supplementary Figure 1

| N                                                                          | Test                                              | Factor                          | Statistic | Statistic Value | p value | Corresponding Figure |
|----------------------------------------------------------------------------|---------------------------------------------------|---------------------------------|-----------|-----------------|---------|----------------------|
|                                                                            |                                                   | Treatment (between subj)        | F         | 5.8579          | 0.0198  |                      |
|                                                                            |                                                   | nicotine conc (within subjects) | F         | 62.9866         | 0.0000  |                      |
| <b>total liquid intake (mL/day) - nic choice - adolescent pretreatment</b> |                                                   |                                 |           |                 |         |                      |
| SAC = 21, NIC = 24                                                         | Shapiro-Wilk normality test                       |                                 | W         | 0.9841          | 0.0127  | Fig S1D              |
|                                                                            | Wilcoxon rank sum test with continuity correction | SAC vs NIC at 0µg/mL            | W         | 243.0000        | 1.0000* |                      |
|                                                                            | Wilcoxon rank sum test with continuity correction | SAC vs NIC at 10µg/mL           | W         | 205.0000        | 1.0000* |                      |
|                                                                            | Wilcoxon rank sum test with continuity correction | SAC vs NIC at 50µg/mL           | W         | 274.0000        | 1.0000* |                      |
|                                                                            | Wilcoxon rank sum test with continuity correction | SAC vs NIC at 100µg/mL          | W         | 312.5000        | 0.8610* |                      |
|                                                                            | Wilcoxon rank sum test with continuity correction | SAC vs NIC at 100µg/mL          | W         | 259.0000        | 1.0000* |                      |
| <b>nicotine consumption (mL/day) - adult pretreatment</b>                  |                                                   |                                 |           |                 |         |                      |
| SAC = 12, NIC = 12                                                         | Shapiro-Wilk normality test                       |                                 | W         | 0.9664          | 0.0043  | Fig S1D              |
|                                                                            | Wilcoxon rank sum test with continuity correction | SAC vs NIC at 0µg/mL            | W         | 243.0000        | 1.0000* |                      |
|                                                                            | Wilcoxon rank sum test with continuity correction | SAC vs NIC at 10µg/mL           | W         | 205.0000        | 0.3130* |                      |
|                                                                            | Wilcoxon rank sum test with continuity correction | SAC vs NIC at 50µg/mL           | W         | 274.0000        | 0.0829* |                      |
|                                                                            | Wilcoxon rank sum test with continuity correction | SAC vs NIC at 100µg/mL          | W         | 312.5000        | 0.8564* |                      |
|                                                                            | Wilcoxon rank sum test with continuity correction | SAC vs NIC at 100µg/mL          | W         | 259.0000        | 1.0000* |                      |
| <b>total liquid intake (mL/day) - nic choice - adult pretreatment</b>      |                                                   |                                 |           |                 |         |                      |
| SAC = 12, NIC = 12                                                         | Shapiro-Wilk normality test                       |                                 | W         | 0.9770          | 0.0374  | Fig S1D              |
|                                                                            | Wilcoxon rank sum test with continuity correction | SAC vs NIC at 0µg/mL            | W         | 67.0000         | 1.0000* |                      |

\* Holm correction for multiple comparisons

## Supplementary Table 1

Detailed Statistics for Supplementary Figure 1

| N                                                 | Test                                              | Factor                      | Statistic                  | Statistic Value | p value | Corresponding Figure |
|---------------------------------------------------|---------------------------------------------------|-----------------------------|----------------------------|-----------------|---------|----------------------|
|                                                   | Wilcoxon rank sum test with continuity correction | SAC vs NIC at 10µg/mL       | W                          | 44.0000         | 0.4494* |                      |
|                                                   | Wilcoxon rank sum test with continuity correction | SAC vs NIC at 50µg/mL       | W                          | 37.0000         | 0.2319* |                      |
|                                                   | Wilcoxon rank sum test with continuity correction | SAC vs NIC at 100µg/mL      | W                          | 49.0000         | 0.5818* |                      |
|                                                   | Wilcoxon rank sum test with continuity correction | SAC vs NIC at 100µg/mL      | W                          | 73.0000         | 1.0000* |                      |
| <b>Open arm entries - adolescent pretreatment</b> |                                                   |                             |                            |                 |         |                      |
| SAC + SAL = 12,<br>SAC + NIC = 16,                | Shapiro-Wilk normality test                       |                             | W                          | 0.9280          | 0.0000  | Fig S11              |
| NIC + SAL = 11, NIC<br>+ NIC = 14                 | Kruskal-Wallis rank sum test                      | All groups, 0-3 min         | Kruskal-Wallis chi-squared | 11.1952         | 0.0107  |                      |
|                                                   | Kruskal-Wallis rank sum test                      | All groups, 3-6 min         | Kruskal-Wallis chi-squared | 11.7069         | 0.0085  |                      |
|                                                   | Kruskal-Wallis rank sum test                      | All groups, 6-9 min         | Kruskal-Wallis chi-squared | 14.1702         | 0.0027  |                      |
|                                                   | Wilcoxon rank sum test with continuity correction | NIC-SAL vs NIC-NIC, 0-3 min | W                          | 53.5000         | 0.5292* |                      |
|                                                   | Wilcoxon rank sum test with continuity correction | SAC-SAL vs SAC-NIC, 0-3 min | W                          | 38.0000         | 0.0279* |                      |
|                                                   | Wilcoxon rank sum test with continuity correction | SAC-SAL vs NIC-SAL, 0-3 min | W                          | 48.0000         | 0.5292* |                      |
|                                                   | Wilcoxon rank sum test with continuity correction | SAC-NIC vs NIC-NIC, 0-3 min | W                          | 144.5000        | 0.5292* |                      |
|                                                   | Wilcoxon rank sum test with continuity correction | NIC-SAL vs NIC-NIC, 3-6 min | W                          | 35.0000         | 0.0707* |                      |
|                                                   | Wilcoxon rank sum test with continuity correction | SAC-SAL vs SAC-NIC, 3-6 min | W                          | 45.5000         | 0.0707* |                      |
|                                                   | Wilcoxon rank sum test with continuity correction | SAC-SAL vs NIC-SAL, 3-6 min | W                          | 77.0000         | 1.0000* |                      |
|                                                   | Wilcoxon rank sum test with continuity correction | SAC-NIC vs NIC-NIC, 3-6 min | W                          | 122.0000        | 1.0000* |                      |
|                                                   | Wilcoxon rank sum test with continuity correction | NIC-SAL vs NIC-NIC, 6-9 min | W                          | 49.5000         | 0.4067* |                      |

\* Holm correction for multiple comparisons

## Supplementary Table 1

Detailed Statistics for Supplementary Figure 1

| N                                                      | Test                                              | Factor                      | Statistic                  | Statistic Value | p value | Corresponding Figure |
|--------------------------------------------------------|---------------------------------------------------|-----------------------------|----------------------------|-----------------|---------|----------------------|
|                                                        | Wilcoxon rank sum test with continuity correction | SAC-SAL vs SAC-NIC, 6-9 min | W                          | 26.5000         | 0.0043* |                      |
|                                                        | Wilcoxon rank sum test with continuity correction | SAC-SAL vs NIC-SAL, 6-9 min | W                          | 83.5000         | 0.4663* |                      |
|                                                        | Wilcoxon rank sum test with continuity correction | SAC-NIC vs NIC-NIC, 6-9 min | W                          | 140.5000        | 0.4663* |                      |
| <b>Distance traveled EOM - adolescent pretreatment</b> |                                                   |                             |                            |                 |         |                      |
| SAC + SAL = 12,<br>SAC + NIC = 16,                     | Shapiro-Wilk normality test                       |                             | W                          | 0.9809          | 0.0265  | Fig S11              |
| NIC + SAL = 11, NIC<br>+ NIC = 14                      | Kruskal-Wallis rank sum test                      | All groups, 0-3 min         | Kruskal-Wallis chi-squared | 14.4259         | 0.0024  |                      |
|                                                        | Kruskal-Wallis rank sum test                      | All groups, 3-6 min         | Kruskal-Wallis chi-squared | 8.5321          | 0.0362  |                      |
|                                                        | Kruskal-Wallis rank sum test                      | All groups, 6-9 min         | Kruskal-Wallis chi-squared | 6.7473          | 0.0804  |                      |
|                                                        | Wilcoxon rank sum test with continuity correction | NIC-SAL vs NIC-NIC, 0-3 min | W                          | 40.0000         | 0.1371* |                      |
|                                                        | Wilcoxon rank sum test with continuity correction | SAC-SAL vs SAC-NIC, 0-3 min | W                          | 30.0000         | 0.0094* |                      |
|                                                        | Wilcoxon rank sum test with continuity correction | SAC-SAL vs NIC-SAL, 0-3 min | W                          | 54.0000         | 0.8837* |                      |
|                                                        | Wilcoxon rank sum test with continuity correction | SAC-NIC vs NIC-NIC, 0-3 min | W                          | 131.0000        | 0.8837* |                      |
|                                                        | Wilcoxon rank sum test with continuity correction | NIC-SAL vs NIC-NIC, 3-6 min | W                          | 54.0000         | 0.6541* |                      |
|                                                        | Wilcoxon rank sum test with continuity correction | SAC-SAL vs SAC-NIC, 3-6 min | W                          | 39.0000         | 0.0349* |                      |
|                                                        | Wilcoxon rank sum test with continuity correction | SAC-SAL vs NIC-SAL, 3-6 min | W                          | 79.0000         | 0.8834* |                      |
|                                                        | Wilcoxon rank sum test with continuity correction | SAC-NIC vs NIC-NIC, 3-6 min | W                          | 130.0000        | 0.8834* |                      |
|                                                        | Wilcoxon rank sum test with continuity correction | NIC-SAL vs NIC-NIC, 6-9 min | W                          | 57.0000         | 0.8572* |                      |
|                                                        | Wilcoxon rank sum test with continuity correction | SAC-SAL vs SAC-NIC, 6-9 min | W                          | 49.0000         | 0.1235* |                      |

\* Holm correction for multiple comparisons

## Supplementary Table 1

Detailed Statistics for Supplementary Figure 1

| N                                            | Test                                              | Factor                      | Statistic                  | Statistic Value | p value | Corresponding Figure |
|----------------------------------------------|---------------------------------------------------|-----------------------------|----------------------------|-----------------|---------|----------------------|
|                                              | Wilcoxon rank sum test with continuity correction | SAC-SAL vs NIC-SAL, 6-9 min | W                          | 71.0000         | 0.8572* |                      |
|                                              | Wilcoxon rank sum test with continuity correction | SAC-NIC vs NIC-NIC, 6-9 min | W                          | 138.0000        | 0.8572* |                      |
| <b>Open arm entries - adult pretreatment</b> |                                                   |                             |                            |                 |         |                      |
| SAC + SAL = 15,<br>SAC + NIC = 15,           | Shapiro-Wilk normality test                       |                             | W                          | 0.8975          | 0.0000  | Fig S1K              |
| NIC + SAL = 15, NIC<br>+ NIC = 16            | Kruskal-Wallis rank sum test                      | All groups, 0-3 min         | Kruskal-Wallis chi-squared | 25.7673         | 0.0000  |                      |
|                                              | Kruskal-Wallis rank sum test                      | All groups, 3-6 min         | Kruskal-Wallis chi-squared | 20.4812         | 0.0001  |                      |
|                                              | Kruskal-Wallis rank sum test                      | All groups, 6-9 min         | Kruskal-Wallis chi-squared | 22.0303         | 0.0001  |                      |
|                                              | Wilcoxon rank sum test with continuity correction | NIC-SAL vs NIC-NIC, 0-3 min | W                          | 100.5000        | 0.0792* |                      |
|                                              | Wilcoxon rank sum test with continuity correction | SAC-SAL vs SAC-NIC, 0-3 min | W                          | 47.0000         | 0.0792* |                      |
|                                              | Wilcoxon rank sum test with continuity correction | SAC-SAL vs NIC-SAL, 0-3 min | W                          | 149.5000        | 0.3767* |                      |
|                                              | Wilcoxon rank sum test with continuity correction | SAC-NIC vs NIC-NIC, 0-3 min | W                          | 284.5000        | 0.0938* |                      |
|                                              | Wilcoxon rank sum test with continuity correction | NIC-SAL vs NIC-NIC, 3-6 min | W                          | 86.5000         | 0.0172* |                      |
|                                              | Wilcoxon rank sum test with continuity correction | SAC-SAL vs SAC-NIC, 3-6 min | W                          | 78.5000         | 0.0020* |                      |
|                                              | Wilcoxon rank sum test with continuity correction | SAC-SAL vs NIC-SAL, 3-6 min | W                          | 181.0000        | 1.0000* |                      |
|                                              | Wilcoxon rank sum test with continuity correction | SAC-NIC vs NIC-NIC, 3-6 min | W                          | 223.0000        | 1.0000* |                      |
|                                              | Wilcoxon rank sum test with continuity correction | NIC-SAL vs NIC-NIC, 6-9 min | W                          | 69.0000         | 0.0043* |                      |
|                                              | Wilcoxon rank sum test with continuity correction | SAC-SAL vs SAC-NIC, 6-9 min | W                          | 86.0000         | 0.0043* |                      |
|                                              | Wilcoxon rank sum test with continuity correction | SAC-SAL vs NIC-SAL, 6-9 min | W                          | 188.5000        | 1.0000* |                      |

\* Holm correction for multiple comparisons



## Supplementary Table 1

Detailed Statistics for Supplementary Figure 1

| N                                                 | Test                                              | Factor                      | Statistic                  | Statistic Value | p value | Corresponding Figure |
|---------------------------------------------------|---------------------------------------------------|-----------------------------|----------------------------|-----------------|---------|----------------------|
|                                                   | Wilcoxon rank sum test with continuity correction | SAC-NIC vs NIC-NIC, 6-9 min | W                          | 224.0000        | 1.0000* |                      |
| <b>Distance traveled EOM - adult pretreatment</b> |                                                   |                             |                            |                 |         |                      |
| SAC + SAL = 15,<br>SAC + NIC = 15,                | Shapiro-Wilk normality test                       |                             | W                          | 0.9697          | 0.0001  | Fig S1K              |
| NIC + SAL = 15, NIC<br>+ NIC = 16                 | Kruskal-Wallis rank sum test                      | All groups, 0-3 min         | Kruskal-Wallis chi-squared | 26.7687         | 0.0000  |                      |
|                                                   | Kruskal-Wallis rank sum test                      | All groups, 3-6 min         | Kruskal-Wallis chi-squared | 21.1452         | 0.0001  |                      |
|                                                   | Kruskal-Wallis rank sum test                      | All groups, 6-9 min         | Kruskal-Wallis chi-squared | 9.8571          | 0.0198  |                      |
|                                                   | Wilcoxon rank sum test with continuity correction | NIC-SAL vs NIC-NIC, 0-3 min | W                          | 87.0000         | 0.0205* |                      |
|                                                   | Wilcoxon rank sum test with continuity correction | SAC-SAL vs SAC-NIC, 0-3 min | W                          | 42.0000         | 0.0000* |                      |
|                                                   | Wilcoxon rank sum test with continuity correction | SAC-SAL vs NIC-SAL, 0-3 min | W                          | 173.0000        | 0.8493* |                      |
|                                                   | Wilcoxon rank sum test with continuity correction | SAC-NIC vs NIC-NIC, 0-3 min | W                          | 260.0000        | 0.3934* |                      |
|                                                   | Wilcoxon rank sum test with continuity correction | NIC-SAL vs NIC-NIC, 3-6 min | W                          | 86.0000         | 0.0188* |                      |
|                                                   | Wilcoxon rank sum test with continuity correction | SAC-SAL vs SAC-NIC, 3-6 min | W                          | 74.0000         | 0.0016* |                      |
|                                                   | Wilcoxon rank sum test with continuity correction | SAC-SAL vs NIC-SAL, 3-6 min | W                          | 189.0000        | 1.0000* |                      |
|                                                   | Wilcoxon rank sum test with continuity correction | SAC-NIC vs NIC-NIC, 3-6 min | W                          | 223.0000        | 1.0000* |                      |
|                                                   | Wilcoxon rank sum test with continuity correction | NIC-SAL vs NIC-NIC, 6-9 min | W                          | 118.0000        | 0.2165* |                      |
|                                                   | Wilcoxon rank sum test with continuity correction | SAC-SAL vs SAC-NIC, 6-9 min | W                          | 114.0000        | 0.0510* |                      |
|                                                   | Wilcoxon rank sum test with continuity correction | SAC-SAL vs NIC-SAL, 6-9 min | W                          | 194.0000        | 1.0000* |                      |
|                                                   | Wilcoxon rank sum test with continuity correction | SAC-NIC vs NIC-NIC, 6-9 min | W                          | 216.0000        | 1.0000* |                      |

\* Holm correction for multiple comparisons

25 **Supplementary Figure 2.** *Supplementary data for Figure 2.* (A) Experimental strategy. (B) Volcano plots  
26 showing differential cFos expression across brain regions following an injection of saline for adolescent-  
27 pretreated (*Left*) and adult-pretreated mice (*Right*). (C-D) Correlation matrices for relationships between  
28 cFos expression in brain regions following an injection of saline in adolescent-pretreated (C) and adult-  
29 pretreated mice (D). (E) Correlation matrices for relationships between cFos expression in brain regions  
30 following an injection of nicotine in adult-pretreated mice. (F) Voxel-by-voxel analysis reveals no change in  
31 reactivity to nicotine within the VTA and DA terminal regions in adult-pretreated mice. (G) Full networks  
32 derived from correlation matrices in Fig 2C and organized into communities with Louvain community  
33 analysis. Source data are provided as a Source Data file.

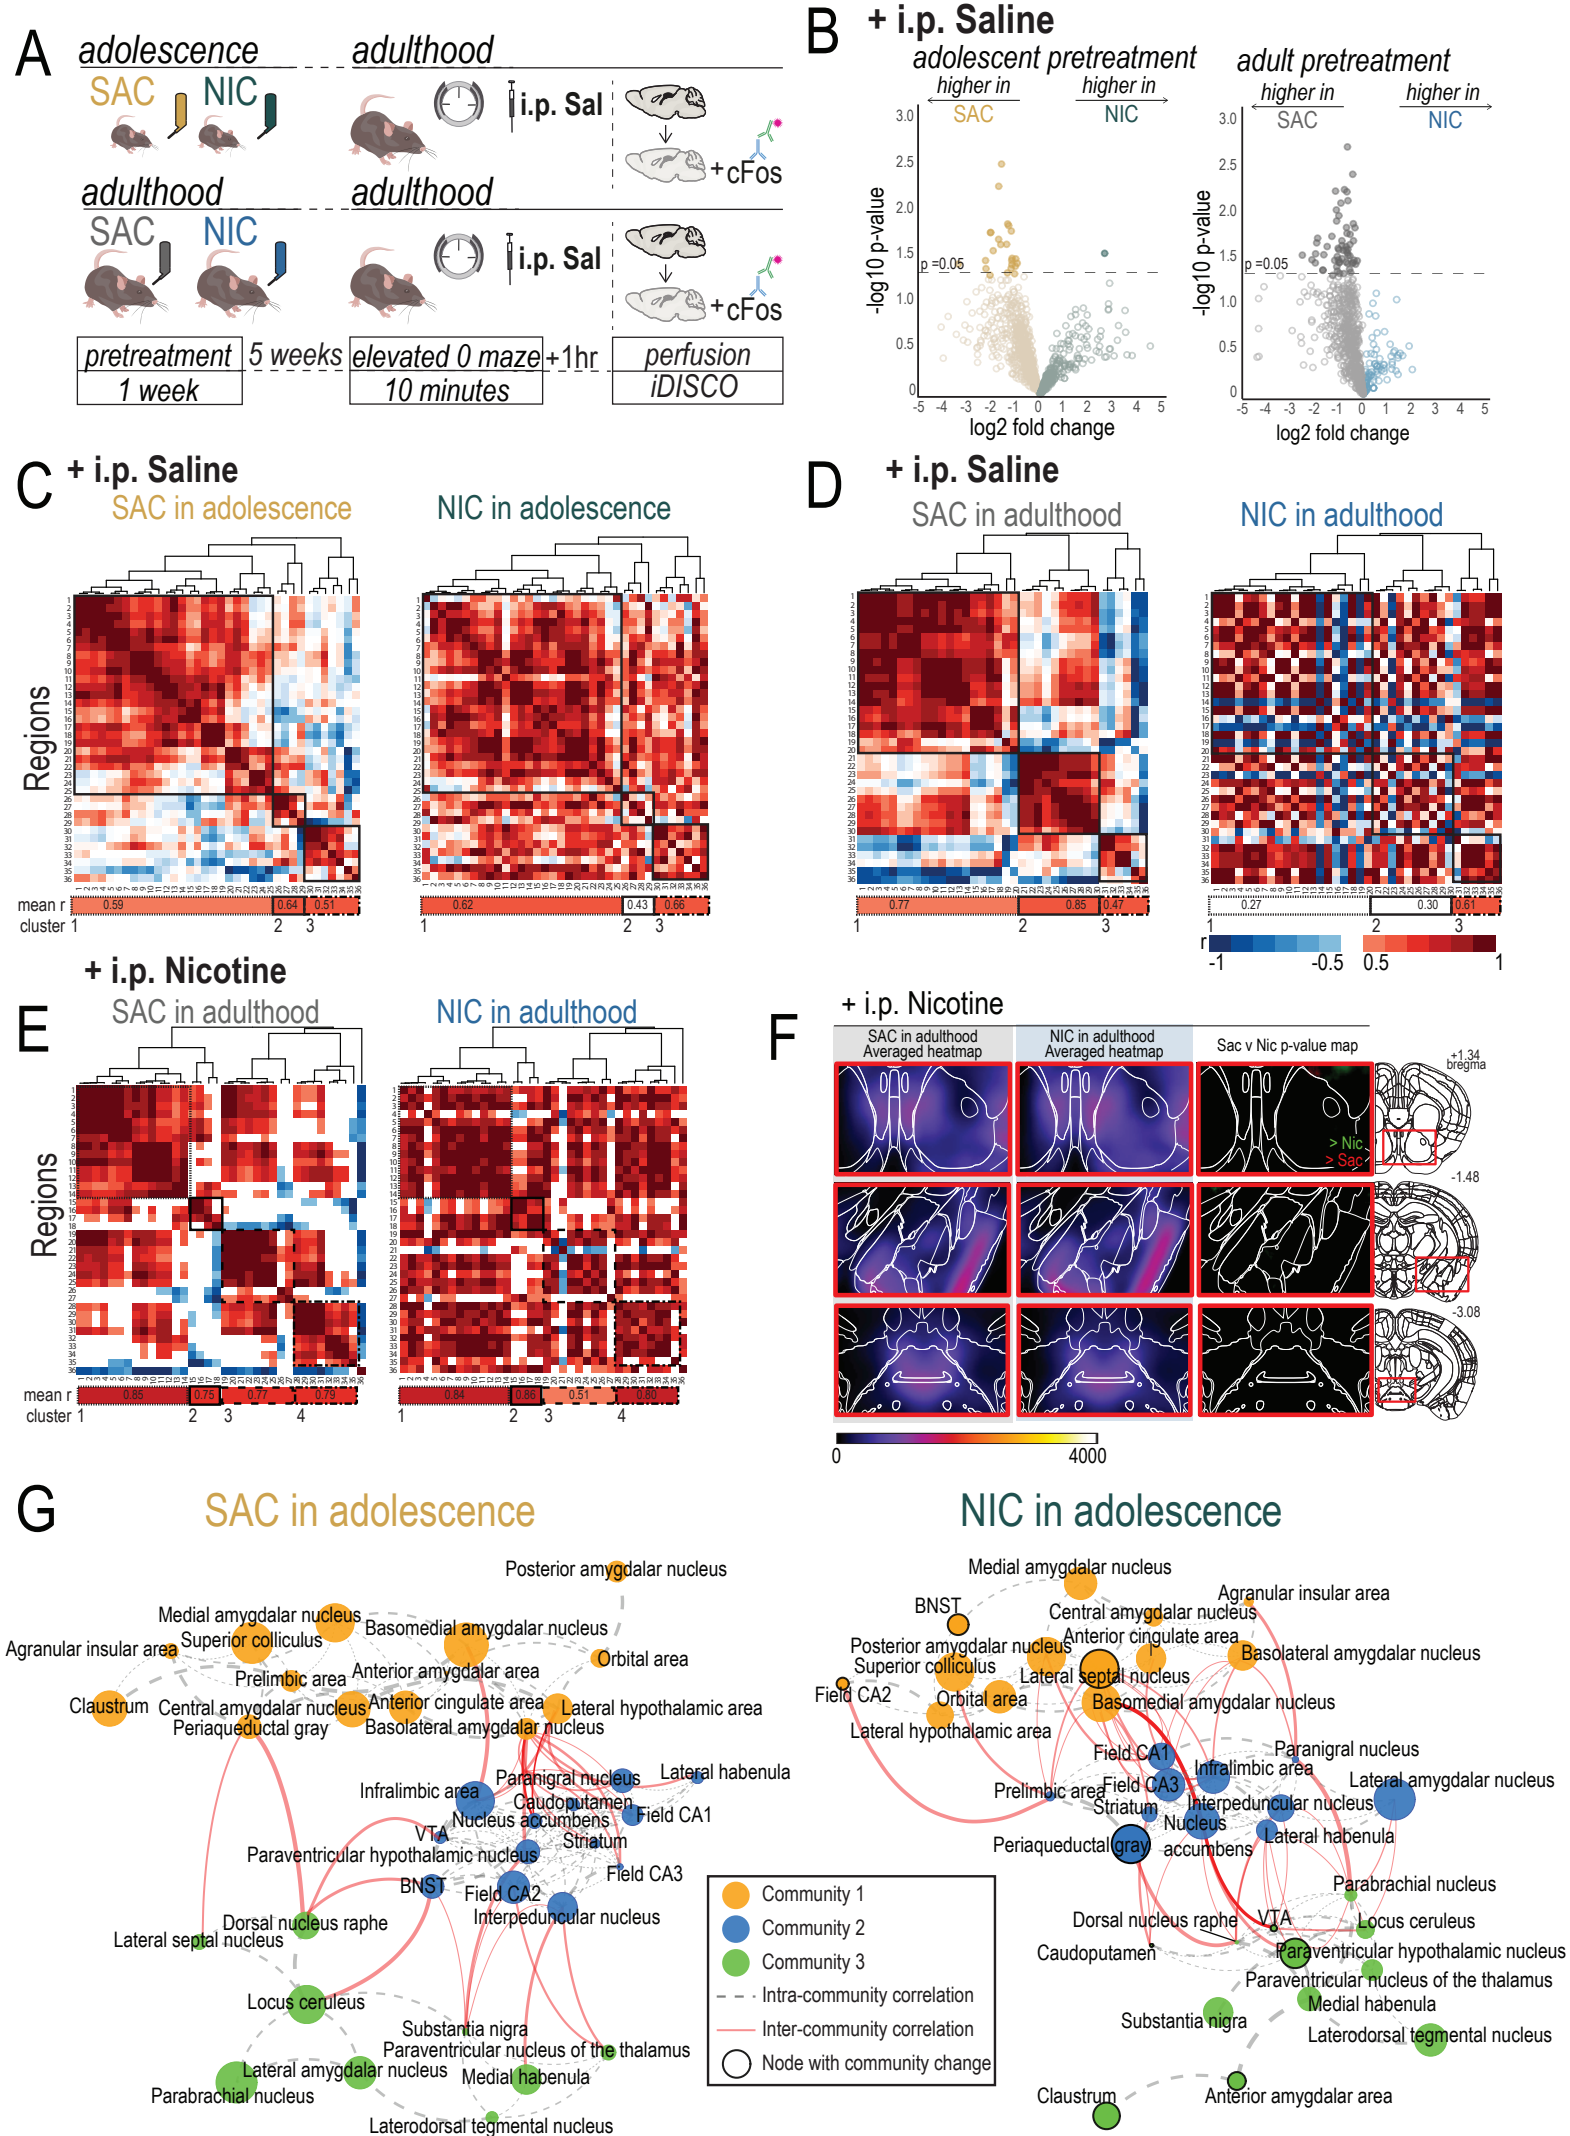

Supplementary Figure 2

34 **Supplementary Figure 3.** *Supplementary data for Figure 3.* (A) Experimental design for DA terminal  
35 density analysis. (B) Tyrosine Hydroxylase (TH)+ labeling in DA terminal regions. (Core = NAc Core, MShell  
36 = NAc Medial Shell, LShell = NAc Lateral Shell, CeA = Central Amygdala, BLA = Basolateral Amygdala,  
37 CPu = Caudate-Putamen). (C) Confocal image processing for bouton segmentation. (D) Bouton density  
38 counts across the NAc (*Left*) and the AMG (*Right*). (E) *Left* : Nicotine current traces were analyzed and  
39 neurons were found to show two types of responses to nicotine: monophasic (one component) and bi-  
40 phasic (with a fast and slow component). More neurons from adult mice pretreated with NIC in adolescence  
41 showed a biphasic response than those treated with SAC. *Center*: Nicotine currents in neurons from mice  
42 treated with NIC in adolescence showed a lower  $\tau$  indicative of a faster current decay. *Right*: Less charge is  
43 transferred in response to a nicotine puff in neurons from mice treated with NIC in adolescence. (F) Average  
44 change in NMDAR currents following application of Ifenprodil (5 mM) to VTA DA neurons (SAC N = 4, n = 7;  
45 NIC N = 4, n = 7). (G) Paired pulse ratio measurements for VTA DA neurons of adolescent-pretreated (*Top*)  
46 and adult-pretreated mice (*Bottom*). (H) sEPSCs onto DA neurons measured before and after nicotine puff  
47 (*Left*) sEPSC frequency was reduced at baseline and after nicotine puff in adult mice pretreated with NIC in  
48 adolescence in comparison to mice pretreated with SAC (*Top row*), however NIC pretreated mice showed a  
49 greater augmentation (% of baseline) in response to the nicotine puff (*Right*). Mice pretreated with NIC in  
50 adulthood showed no differences from mice pretreated with SAC in adulthood (*Bottom row*). All bar graphs  
51 are presented as mean values  $\pm$  SEM. \*p < 0.05, \*\*p < 0.01, \*\*\*p < 0.01. Detailed Statistics are available in  
52 Supplementary Table 5. Source data are provided as a Source Data file.

53

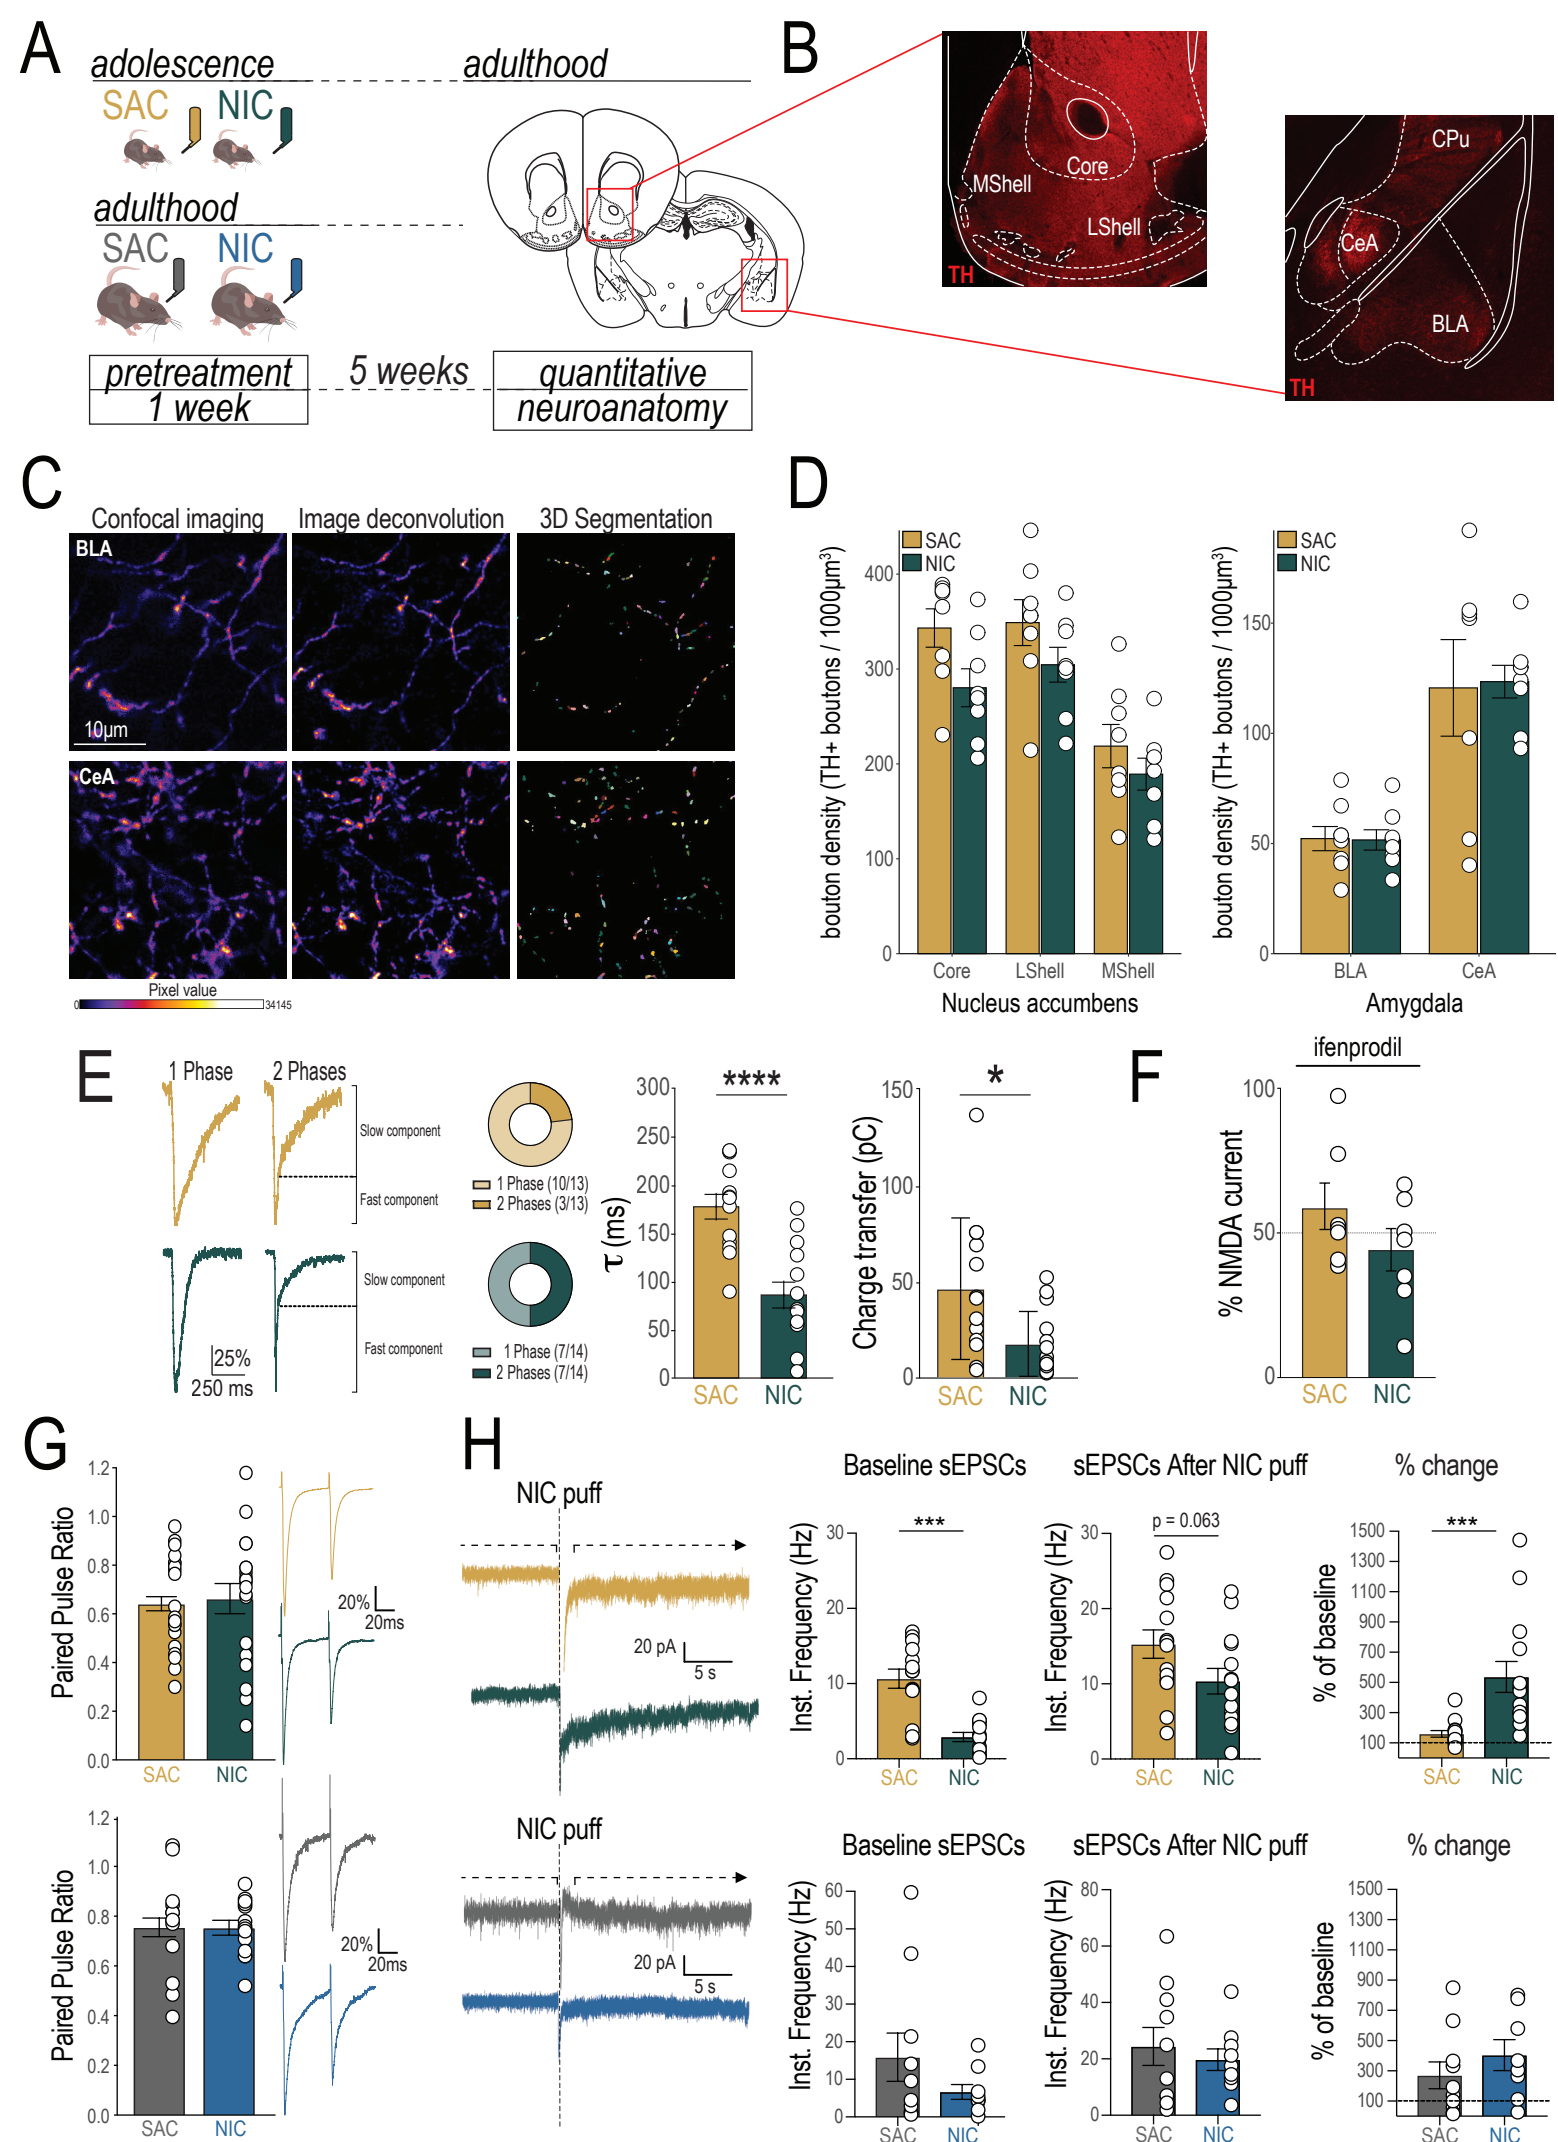

Supplementary Figure 3

## Supplementary Table 2

Detailed Statistics for Supplementary Figure 3

| N                                                  | Test                                              | Factor                   | Statistic | Statistic Value | p value             | Corresponding Figure |
|----------------------------------------------------|---------------------------------------------------|--------------------------|-----------|-----------------|---------------------|----------------------|
| <b>NAC boutons</b>                                 |                                                   |                          |           |                 |                     |                      |
| SAC = 8, NIC = 8                                   | Shapiro-Wilk normality test                       |                          | W         | 0.9719          | 0.3007              | Fig S3D              |
|                                                    | Two-way mixed ANOVA                               | Interaction              | F         | 1.1643          | 0.3268              |                      |
|                                                    |                                                   | Treatment (between subj) | F         | 3.0443          | 0.1029              |                      |
|                                                    |                                                   | Region (within subjects) | F         | 74.5824         | 0.0000              |                      |
| <b>Amg boutons</b>                                 |                                                   |                          |           |                 |                     |                      |
| SAC = 7, NIC = 8                                   | Shapiro-Wilk normality test                       |                          | W         | 0.8895          | 0.0040              | Fig S3D              |
|                                                    | Wilcoxon rank sum test with continuity correction | SAC vs NIC in the BLA    | W         | 34.0000         | 1.0000 <sup>1</sup> |                      |
|                                                    | Wilcoxon rank sum test with continuity correction | SAC vs NIC in the CeA    | W         | 31.0000         | 1.0000 <sup>1</sup> |                      |
|                                                    | Wilcoxon rank sum test with continuity correction | BLA vs CeA in SAC        | W         | 11.0000         | 0.1686 <sup>1</sup> |                      |
|                                                    | Wilcoxon rank sum test with continuity correction | BLA vs CeA in NIC        | W         | 0.0000          | 0.0038 <sup>1</sup> |                      |
| <b>Weighted Tau, nicotine current</b>              |                                                   |                          |           |                 |                     |                      |
| NIC = 2 mice, 14 neurons; SAC = 2 mice, 13 neurons | Shapiro-Wilk normality test                       |                          | W         | 0.9567          | 0.3102              | Fig S3E              |
|                                                    | Welch Two Sample t-test                           | SAC vs NIC               | t         | -6.7097         | 0.0000              |                      |
| <b>Charge Transferred - nicotine current</b>       |                                                   |                          |           |                 |                     |                      |
| NIC = 2 mice, 14 neurons; SAC = 2 mice, 13 neurons | Shapiro-Wilk normality test                       |                          | W         | 0.8268          | 0.0004              | Fig S3E              |
|                                                    | Wilcoxon rank sum test with continuity correction | SAC vs NIC               | W         | 141.0000        | 0.0163              |                      |
| <b>% NMDA current - ifenprodil</b>                 |                                                   |                          |           |                 |                     |                      |
| NIC = 4 mice, 7 neurons; SAC = 4 mice, 7 neurons   | Shapiro-Wilk normality test                       |                          | W         | 0.9679          | 0.8470              | Fig S3F              |
|                                                    | Welch Two Sample t-test                           | SAC vs NIC               | t         | -1.3859         | 0.1912              |                      |

<sup>1</sup> Holm correction for multiple comparisons

## Supplementary Table 2

Detailed Statistics for Supplementary Figure 3

| N                                                  | Test                                              | Factor     | Statistic | Statistic Value | p value | Corresponding Figure |
|----------------------------------------------------|---------------------------------------------------|------------|-----------|-----------------|---------|----------------------|
| <b>PPR - adolescent pretreatment</b>               |                                                   |            |           |                 |         |                      |
| NIC = 5 mice, 20 neurons; SAC = 5 mice, 19 neurons | Shapiro-Wilk normality test                       |            | W         | 0.9746          | 0.5122  | Fig S3G              |
|                                                    | Welch Two Sample t-test                           | SAC vs NIC | t         | 0.3017          | 0.7653  |                      |
| <b>PPR - adult pretreatment</b>                    |                                                   |            |           |                 |         |                      |
| NIC = 4 mice, 12 neurons; SAC = 4 mice, 14 neurons | Shapiro-Wilk normality test                       |            | W         | 0.9705          | 0.6154  | Fig S3G              |
|                                                    | Welch Two Sample t-test                           | SAC vs NIC | t         | -0.0377         | 0.9702  |                      |
| <b>Baseline sEPSCs - adolescent pretreatment</b>   |                                                   |            |           |                 |         |                      |
| NIC = 2 mice, 14 neurons; SAC = 2 mice, 14 neurons | Shapiro-Wilk normality test                       |            | W         | 0.9020          | 0.0127  | Fig S3H              |
|                                                    | Wilcoxon rank sum test with continuity correction | SAC vs NIC | W         | 18.0000         | 0.0003  |                      |
| <b>After sEPSCs - adolescent pretreatment</b>      |                                                   |            |           |                 |         |                      |
| NIC = 2 mice, 14 neurons; SAC = 2 mice, 14 neurons | Shapiro-Wilk normality test                       |            | W         | 0.9656          | 0.4681  | Fig S3H              |
|                                                    | Welch Two Sample t-test                           | SAC vs NIC | t         | -1.9394         | 0.0635  |                      |
| <b>Percent sEPSCs - adolescent pretreatment</b>    |                                                   |            |           |                 |         |                      |
| NIC = 2 mice, 14 neurons; SAC = 2 mice, 14 neurons | Shapiro-Wilk normality test                       |            | W         | 0.7356          | 0.0000  | Fig S3H              |
|                                                    | Wilcoxon rank sum test with continuity correction | SAC vs NIC | W         | 183.0000        | 0.0001  |                      |
| <b>Baseline sEPSCs - adult pretreatment</b>        |                                                   |            |           |                 |         |                      |
| NIC = 5 mice, 8 neurons; SAC = 5 mice, 10 neurons  | Shapiro-Wilk normality test                       |            | W         | 0.6963          | 0.0001  | Fig S3H              |
|                                                    | Wilcoxon rank sum test with continuity correction | SAC vs NIC | W         | 39.0000         | 0.6534  |                      |
| <b>After sEPSCs - adult pretreatment</b>           |                                                   |            |           |                 |         |                      |
| NIC = 5 mice, 8 neurons; SAC = 5 mice, 10 neurons  | Shapiro-Wilk normality test                       |            | W         | 0.9171          | 0.1001  | Fig S3H              |

<sup>1</sup> Holm correction for multiple comparisons

## Supplementary Table 2

Detailed Statistics for Supplementary Figure 3

| N                                                     | Test                                              | Factor     | Statistic | Statistic Value | p value | Corresponding Figure |
|-------------------------------------------------------|---------------------------------------------------|------------|-----------|-----------------|---------|----------------------|
|                                                       | Welch Two Sample t-test                           | SAC vs NIC | t         | -0.6067         | 0.5536  |                      |
| <b>Percent sEPSCs - adult pretreatment</b>            |                                                   |            |           |                 |         |                      |
| NIC = 5 mice, 8 neurons; SAC = 5 mice, 10 neurons     | Shapiro-Wilk normality test                       |            | W         | 0.8870          | 0.0343  | Fig S3H              |
|                                                       | Wilcoxon rank sum test with continuity correction | SAC vs NIC | W         | 52.0000         | 0.3069  |                      |
| <sup>1</sup> Holm correction for multiple comparisons |                                                   |            |           |                 |         |                      |
